# Supplementary material
Source: PubMed Central journal article supplement (PMC3139809)
Supplement: NIHMS264512-supplement-01.pdf [file NIHMS264512-supplement-01.pdf]

**Table 6: Average Peripapillary Choroidal Thickness and Univariable Associations**

|                                                         | <b>N</b> | <b>Beta [95% CI]</b> | <b>p value</b> |
|---------------------------------------------------------|----------|----------------------|----------------|
| Glaucoma (vs Glaucoma Suspect)                          | 73       | -20.7 [-53.3, 11.8]  | 0.21           |
| Diagnosis                                               |          |                      |                |
| PAC/S (vs OAGS)                                         | 73       | 56.0 [8.6, 103.5]    | 0.02           |
| OAG (vs OAGS)                                           | 73       | 1.8 [-36.2, 39.9]    | 0.92           |
| PACG (vs OAGS)                                          | 73       | -6.5 [-62.5, 49.4]   | 0.82           |
| Age (years)                                             | 73       | -2.8 [-4.1, -1.4]    | <0.001         |
| Axial Length (mm)                                       | 72       | -14.1 [-22.7, -5.5]  | 0.002          |
| Female Sex (vs Male)                                    | 73       | -2.2 [-35.8, 31.4]   | 0.9            |
| Non-White Race (vs White)                               | 73       | 15.3 [-24.3, 54.9]   | 0.44           |
| CCT (um)                                                | 71       | -0.2 [-0.7, 0.2]     | 0.26           |
| IOP at imaging (mmHg)                                   | 73       | 0.7 [-2.5, 3.9]      | 0.65           |
| N° glaucoma meds                                        | 73       | -2.8 [-15.7, 10.2]   | 0.67           |
| Visual Field MD (dB)                                    | 73       | -0.3 [-2.4, 1.9]     | 0.82           |
| NFL Thickness (um)                                      | 73       | 0.5 [-0.4, 1.3]      | 0.27           |
| Highest Known IOP (mmHg)                                | 73       | -0.1 [-1.9, 1.7]     | 0.9            |
| Pseudophakia                                            | 73       | 31.5 [-10.8, 73.9]   | 0.14           |
| Previous glaucoma surgery                               | 73       | -12.2 [-48.4, 24.0]  | 0.5            |
| SBP (mmHg)                                              | 69       | -0.5 [-1.6, 0.6]     | 0.39           |
| DBP (mmHg)                                              | 69       | 1.6 [-0.2, 3.5]      | 0.09           |
| HR (bpm)                                                | 69       | 0.9 [-0.7, 2.5]      | 0.26           |
| Systolic Ocular Perfusion Pressure (mmHg) <sup>†</sup>  | 69       | -0.6 [-1.7, 0.6]     | 0.31           |
| Mean Ocular Perfusion Pressure (mmHg) <sup>‡</sup>      | 69       | 0.5 [-1.2, 2.3]      | 0.54           |
| Diastolic Ocular Perfusion Pressure (mmHg) <sup>§</sup> | 69       | 1.4 [-0.5, 3.2]      | 0.15           |

CI (Confidence Interval), OAGS (Open Angle Glaucoma Suspect), PAC/S (Primary Angle Closure Suspect and Primary Angle Closure), OAG (Open Angle Glaucoma), PACG (Primary Angle Closure Glaucoma), CCT (Central Corneal Thickness), IOP (Intraocular Pressure), MD (Mean deviation), NFL (Nerve Fiber Layer Thickness), SBP (Systolic Blood Pressure), DBP (Diastolic Blood Pressure), HR (Heart Rate)

<sup>†</sup> Calculated as the differential pressure between SBP and IOP

<sup>‡</sup> Calculated as the differential pressure between Mean BP and IOP (Mean BP = DBP + (1/3\*(SBP-DBP)))

<sup>§</sup> Calculated as the differential pressure between DBP and IOP
