# Supplementary material
Source: PubMed Central journal article supplement (PMC3139809)
Supplement: NIHMS264512-supplement-02.pdf [file NIHMS264512-supplement-02.pdf]

**Table 7: Average Peripapillary Choroidal Thickness and Stepwise Model  
Multivariable Associations†**

|                                             | <b>Beta [95% CI]</b> | <b>p value</b> |
|---------------------------------------------|----------------------|----------------|
| Glaucoma (vs Glaucoma Suspect)              | -8.3 [-38.7, 22.1]   | 0.59           |
| Female Sex (vs Male)                        | -17.8 [-49.3, 13.8]  | 0.26           |
| Non-White Race (vs White)                   | 13.9 [-23.8, 51.7]   | 0.46           |
| Age (years)                                 | -3.2 [-4.5, -1.9]    | <0.001         |
| Axial Length (mm)                           | -13.9 [-22.8, -5.1]  | 0.003          |
| CCT (um)                                    | -0.4 [-0.8, 0.0]     | 0.06           |
| Diastolic Ocular Perfusion Pressure (mmHg)† | 2.5 [0.8, 4.2]       | 0.005          |

CI (Confidence Interval), IOP (Intraocular Pressure), CCT (Central Corneal Thickness), DBP (Diastolic Blood Pressure), BP (Blood Pressure)

† Calculated as the differential pressure between Mean BP and IOP (Mean BP = DBP + (1/3\*(SBP-DBP)))
