# Supplementary material
Source: PubMed Central journal article supplement (PMC3139809)
Supplement: NIHMS264512-supplement-03.pdf [file NIHMS264512-supplement-03.pdf]

**Table 8: Average Peripapillary Choroidal Thickness and Stepwise Model Multivariable Associations**

|                                                         | Beta [95% CI]       | p value |
|---------------------------------------------------------|---------------------|---------|
| Diagnosis                                               |                     |         |
| PAC/S (vs OAGS)                                         | 17.6 [-31.6, 66.8]  | 0.48    |
| OAG (vs OAGS)                                           | 4.5 [-29.3, 38.4]   | 0.79    |
| PACG (vs OAGS)                                          | -35.0 [-87.3, 17.3] | 0.19    |
| Female Sex (vs Male)                                    |                     |         |
| Female Sex (vs Male)                                    | -17.0 [-48.4, 14.4] | 0.28    |
| Non-White Race (vs White)                               | 21.5 [-17.0, 60.0]  | 0.27    |
| Age (years)                                             | -3.2 [-4.5, -1.8]   | <0.001  |
| Axial Length (mm)                                       | -13.4 [-23.8, -3.0] | 0.01    |
| CCT (um)                                                | -0.4 [-0.8, -0.0]   | 0.05    |
| Diastolic Ocular Perfusion Pressure (mmHg) <sup>†</sup> | 2.3 [0.6, 4.0]      | 0.008   |

CI (Confidence Interval), OAGS (Open Angle Glaucoma Suspect), PAC/S (Primary Angle Closure Suspect and Primary Angle Closure), OAG (Open Angle Glaucoma), PACG (Primary Angle Closure Glaucoma), IOP (Intraocular Pressure), CCT (Central Corneal Thickness), DBP (Diastolic Blood Pressure), BP (Blood Pressure)

<sup>†</sup> Calculated as the differential pressure between Mean BP and IOP (Mean BP = DBP + (1/3\*(SBP-DBP)))
