# Supplementary material
Source: PubMed Central journal article supplement (PMC3139809)
Supplement: NIHMS264512-supplement-04.pdf [file NIHMS264512-supplement-04.pdf]

**Table 9: Macular and Peripapillary Mean Choroidal Thickness by Glaucoma Diagnosis**

|                                            | Glaucoma Suspects |      |       | Glaucoma |      |      | All Subjects |         |
|--------------------------------------------|-------------------|------|-------|----------|------|------|--------------|---------|
|                                            | N                 | OAGS | PAC/S | Overall  | OAG  | PACG |              | Overall |
| <b>Macular Central 6 mm ChT</b>            |                   |      |       |          |      |      |              |         |
| Crude Mean, $\mu\text{m}$                  |                   | 238  | 339   | 276      | 221  | 219  | 221          | 247     |
| (SE)                                       | 73                | (13) | (25)  | (15)     | (15) | (23) | (13)         | (10)    |
| Adjusted Mean, $\mu\text{m}$               |                   | 244  | 338   | 276      | 227  | 199  | 225          | 251     |
| (SE) <sup>§</sup>                          | 67                | (14) | (19)  | (13)     | (13) | (26) | (13)         | (8)     |
| <b>Subfoveal ChT<sup>†</sup></b>           |                   |      |       |          |      |      |              |         |
| Crude Mean, $\mu\text{m}$                  |                   | 271  | 384   | 313      | 239  | 234  | 238          | 274     |
| (SE)                                       | 73                | (17) | (30)  | (18)     | (19) | (31) | (16)         | (13)    |
| Adjusted Mean, $\mu\text{m}$               |                   | 278  | 380   | 313      | 247  | 216  | 245          | 280     |
| (SE) <sup>§</sup>                          | 67                | (19) | (26)  | (17)     | (18) | (35) | (17)         | (10)    |
| <b>Peripapillary 360° ChT<sup>‡</sup>,</b> |                   |      |       |          |      |      |              |         |
| Crude Mean, $\mu\text{m}$                  |                   | 175  | 231   | 196      | 177  | 169  | 175          | 185     |
| (SE)                                       | 73                | (14) | (22)  | (13)     | (13) | (18) | (11)         | (8)     |
| Adjusted Mean, $\mu\text{m}$               |                   | 179  | 231   | 196      | 182  | 159  | 178          | 188     |
| (SE) <sup>§</sup>                          | 67                | (13) | (18)  | (11)     | (12) | (23) | (11)         | (7)     |

SE (Standard Error), OAGS (Open Angle Glaucoma Suspect), PAC/S (Primary Angle Closure Suspect and Primary Angle Closure), OAG (Open Angle Glaucoma), PACG (Primary Angle Closure Glaucoma), ChT (Choroidal Thickness)

§ Adjusted mean choroidal thickness by: Sex, race, age, axial length, central corneal thickness and diastolic blood pressure.

† In macular scans, subfoveal ChT was on average 27  $\mu\text{m}$  thicker than in the 6 mm ChT (95% CI, [19, 35],  $p < 0.001$ ).

‡ Peripapillary ChT was on average 62  $\mu\text{m}$  thinner than macular overall (6 mm) ChT (95% CI, [51, 73],  $p < 0.001$ ).

Peripapillary ChT was on average 89  $\mu\text{m}$  thinner than subfoveal ChT (95% CI, [73, 105],  $p < 0.001$ ).
